1        **CRISPR/Cas9-mediated gene disruption of endogenous co-receptors confers**  
2                **broad resistance to HIV-1 in human primary cells and humanized mice**

3

4        **Shasha Li<sup>1</sup>, Leo Holguin<sup>2</sup>, John C. Burnett<sup>1,2\*</sup>**

5        1 Center for Gene Therapy, Beckman Research Institute of City of Hope, Duarte, CA,  
6        USA; 2 Irell and Manella School of Biological Sciences, Duarte, CA, USA

7        \*Correspondence: John Burnett (jburnett@coh.org)

8        **Abstract**

9        In this project, we investigated the CRISPR/Cas9 system for creating HIV resistance by  
10        targeting the human *CCR5* and *CXCR4* genes, which encode cellular co-receptors  
11        required for HIV-1 infection. Using a clinically scalable system for transient *ex vivo*  
12        delivery of Cas9/gRNA ribonucleoprotein (RNP) complexes, we demonstrated that  
13        CRISPR-mediated disruption of *CCR5* and *CXCR4* in T-lymphocytes cells significantly  
14        reduced surface expression of the co-receptors, thereby establishing resistance to HIV-1  
15        infection by *CCR5* (R5)-tropic, *CXCR4* (X4)-tropic, and dual (R5/X4)-tropic strains.  
16        CRISPR-mediated disruption of the *CCR5* alleles in human CD34<sup>+</sup> hematopoietic stem  
17        and progenitor cells (HSPCs) led to the differentiation of HIV-resistant macrophages. In  
18        human CD4<sup>+</sup> T cells transplanted into a humanized mouse model, disruption of *CXCR4*  
19        inhibited replication of X4-tropic HIV-1, thus leading to the virus-mediated enrichment  
20        *CXCR4*-disrupted cells in the peripheral blood and spleen. However, in human CD4<sup>+</sup> T  
21        cells with both *CCR5* and *CXCR4* disruption, we observed poor engraftment in bone

22 marrow, although significant changes were not observed in the lung, spleen, or peripheral  
23 blood. This study establishes a clinically scalable strategy for the dual knockout of HIV-1  
24 co-receptors as a therapeutic strategy, while also raising caution of disrupting *CXCR4*,  
25 which may abate engraftment of CD4<sup>+</sup> T cells in bone marrow.

26

27 **Keywords:** HIV, CRISPR, CCR5, CXCR4, gene editing,

28

## 29 Introduction

30 Human immunodeficiency virus 1 (HIV-1), the virus that causes AIDS, currently  
31 afflicts more than 38 million people worldwide.<sup>1</sup> Despite the effectiveness of antiretroviral  
32 therapy (ART) in controlling HIV-1 replication and infection, these drugs are unable to  
33 eradicate the virus from a patient. Complicating matters, accessibility to ART and daily  
34 compliance are challenging for millions living with HIV, and HIV-infected individuals  
35 disproportionately suffer from accelerated aging and an increased risk of age-related  
36 health complications.<sup>2</sup> Unfortunately, An HIV-1 cure remains elusive. Innovative  
37 therapeutic strategies are currently being explored as potential alternatives to ART,<sup>3</sup>  
38 including gene-editing strategies which inhibit viral infection.<sup>4</sup>

39 The HIV-1 replication cycle begins with the viral particle binding to the CD4  
40 receptor and then either to the CCR5 or the CXCR4 co-receptor on the target cells.  
41 Binding then triggers fusion of the viral and host cell membranes, thereby facilitating entry  
42 into the cell, where the viral genome undergoes reverse transcription and integration into  
43 the host genome. Of the two primary co-receptors, CCR5 is the cellular co-receptor used  
44 by the majority of HIV-1 strains for binding and entry<sup>5</sup> and is critical for primary infection  
45 via mucosal transmission.<sup>6</sup> Approximately ~1% of individuals of northern European  
46 descent are homozygous for the *CCR5* $\Delta$ 32 allele, which is characterized by a 32-bp  
47 deletion that results in a truncated CCR5 protein that is not expressed on the cell surface.  
48 While these individuals are healthy despite lacking a functional *CCR5* gene, they are also  
49 highly resistant to HIV-1 infection.<sup>7,8</sup> The first two documented functional cures of HIV-1  
50 were with patients who received allogeneic transplantation with hematopoietic stem cells  
51 from *CCR5* $\Delta$ 32 homozygous donors for the treatment of acute myeloid leukemia<sup>9,10</sup> or

52 refractory Hodgkin lymphoma.<sup>11</sup> However, this general strategy has been met with mixed  
53 success, and several other patients have experienced complications due to allogeneic  
54 stem cell transplantation or relapse of underlying cancer,<sup>12,13</sup> while others have been  
55 marked by the emergence of CXCR4 (X4)-tropic HIV-1 strains that do not utilize the CCR5  
56 co-receptor.<sup>14</sup>

57 Numerous gene editing tools have been used against *CCR5* to inhibit R5-tropic  
58 HIV-1 infection *in vitro* and *in vivo*, including ZFN,<sup>15-18</sup> TALEN,<sup>19-21</sup> and CRISPR/Cas  
59 systems.<sup>22-24</sup> Due to the possibility of HIV-resistance to *CCR5* gene disruption, which  
60 occurs through natural tropism shift, it is likely necessary to disrupt *CXCR4* to eradicate  
61 HIV-1 infections in most individuals. Hence, ZFN<sup>25,26</sup> and CRISPR/Cas<sup>27,28</sup> systems have  
62 been designed edit *CXCR4* for the inhibition of X4-tropic HIV-1. Moreover, a few studies  
63 have explored the simultaneous disruption of *CCR5* and *CXCR4* alleles using two zinc-  
64 finger nucleases<sup>29</sup> or two sgRNAs via CRISPR/Cas9.<sup>30</sup> Although many of these  
65 approaches are still in the preclinical stage, clinical trials primarily focused on the use of  
66 ZFN<sup>31,32</sup> or CRISPR/Cas9<sup>33</sup> for *CCR5* editing have yielded promising results in clinical  
67 safety and efficacy tests, while *CXCR4* gene editing strategies have not yet been tested  
68 clinically.

69 Translation of gene editing technology utilizing disrupting co-receptors for treating  
70 HIV/AIDS, demands exquisite on-target precision, ample efficiency, and delivery  
71 approaches that are scalable and clinically feasible. In the present study, we have utilized  
72 the CRISPR-Cas9 gene-editing system to disrupt *CCR5*, *CXCR4* genes or both to create  
73 HIV-resistance in human primary T cells in a clinically scalable system. Importantly, we  
74 demonstrated that the resulting cells yield different selective advantages in HIV infection,

75 with specific HIV-1 strains (R5 tropic, X4 tropic and dual tropic) that utilize either the *CCR5*  
76 or *CXCR4* surface receptors or both. Next, we evaluated the gene-modified cells in a  
77 humanized mouse model. Our study gives an in-depth investigation of CRISPR disrupted  
78 *CCR5* or/and *CXCR4* co-receptor in aim of a cure for HIV/AIDS. These experiments lay  
79 the groundwork for creating HIV-1 resistance in a clinically scalable system.

80

## 81 **Results**

### 82 ***CRISPR-Cas9-mediated disruption of CCR5 protect cells from HIV-1 infection***

83 To evaluate the CRISPR-Cas9 system in creating HIV-resistant cells, we first  
84 utilized a previously described approach with lentiviral expression of both the single guide  
85 RNA (sgRNA) and human codon-optimized *Streptococcus pyogenes* Cas9 (spCas9)  
86 components, as well as the TagRFP reporter gene.<sup>34</sup> Using a sgRNA design algorithm,<sup>35</sup>  
87 we selected unique guides sequences to target *CCR5* with the CRISPR-Cas9 system.  
88 CEM.NK<sup>R</sup>CCR5<sup>+</sup> cells (i.e., human CD4<sup>+</sup> lymphoblast cells with retroviral vector  
89 expression of human CCR5<sup>36</sup>) were transduced with the lentiviral vectors at a low  
90 multiplicity of infection (MOI ~ 0.1). A control vector was created which carried an  
91 irrelevant sgRNA sequence in addition to the spCas9 and TagRFP expression cassettes.  
92 One week after transduction, transduced cells were sorted by FACS for TagRFP  
93 expression and analyzed for CCR5 surface expression by flow cytometry to assess the  
94 degree of CRISPR-mediated gene knockout. Surface expression of CCR5 was  
95 significantly reduced in the cells treated with CCR5-CRISPR (81.7% CCR5<sup>+</sup> cells in  
96 control vs. 4.3% CCR5<sup>+</sup> cells in CCR5-CRISPR, **Figure 1A**). Genomic DNA was analyzed  
97 for gene editing using CEL1 Surveyor Nuclease Assay, which revealed 62% ablation  
98 efficiency of *CCR5* (**Figure 1B**). Gene disruption was further characterized by NGS  
99 analysis of across the *CCR5* target site, which revealed significant and frequent insertions  
100 and deletions (indels) at the sgRNA target site, consistent with the imprecise DNA repair  
101 mechanism of non-homologous end-joining (NHEJ) (**Figure S1**). Deep sequencing of the  
102 *CCR5* target site revealed CRISPR-induced indels in 87.9% of the total reads (**Figure**  
103 **1C**), ranging from single base pair (bp) insertions or deletions to insertions or deletions

104 exceeding 100bp. To investigate whether CRISPR-mediated disruption of the *CCR5* gene  
105 facilitated HIV resistance, we challenged the gene-modified CEM cells with R5-tropic HIV-  
106 1<sub>BaL</sub> and observed HIV replication over a 4-week time course. HIV-1 replication was  
107 suppressed in the CCR5-CRISPR cells, with supernatant p24 antigen levels greater than  
108 100-fold lower than the control group at 14, 17, 21, and 28 days after HIV-1<sub>BaL</sub> challenge  
109 (Figure 1D).

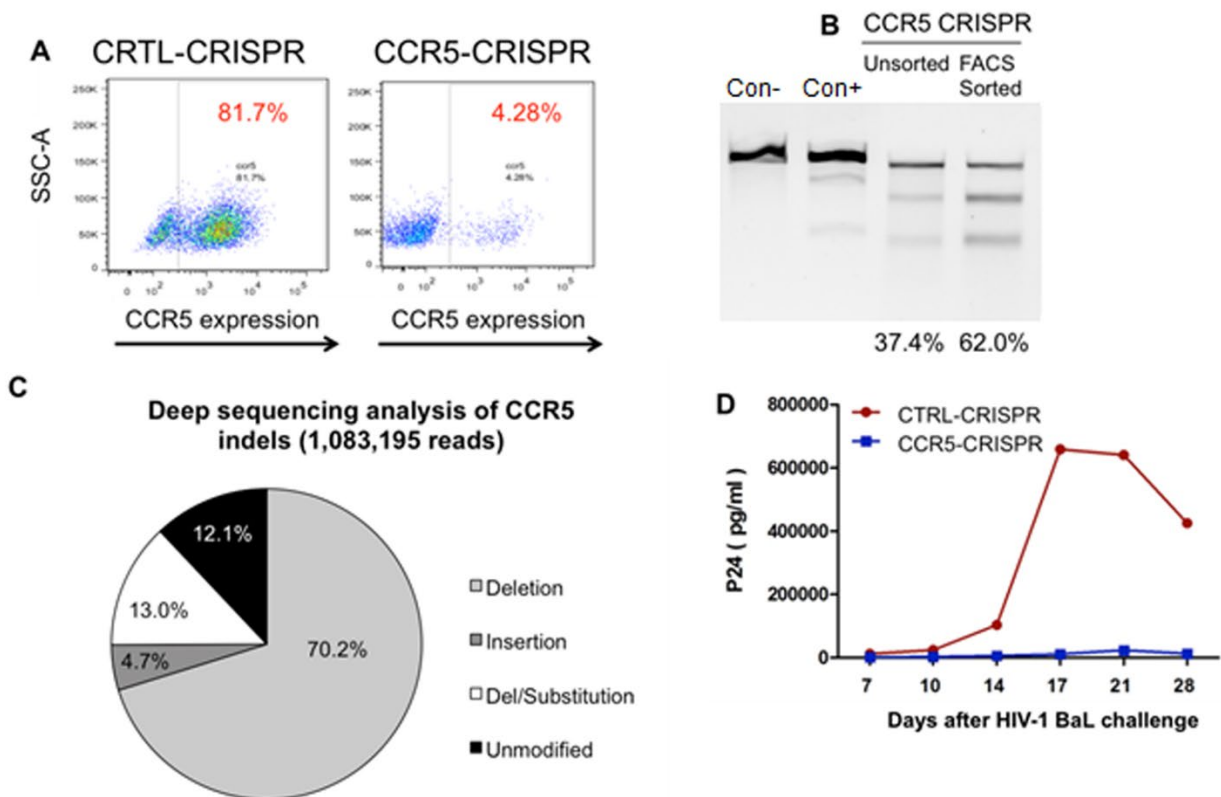

110

111 **Figure 1. CRISPR/Cas9 gene disruption of CCR5 in CD4<sup>+</sup> T cells.** A. CEM  
112 CCR5<sup>+</sup>CD4<sup>+</sup> T cells were transduced with CCR5-CRISPR vector or control vector and  
113 analyzed for CCR5 surface expression by flow cytometry. B. Indels detection by Surveyor  
114 assay in CEM CCR5<sup>+</sup>CD4<sup>+</sup> T cells after CCR5 CRISPR-Cas9 modification. C. Deep  
115 sequencing analysis of CRISPR/Cas9-induced genome disruption by of CCR5. D. HIV-

116 1<sub>BaL</sub> replication in CEM CCR5<sup>+</sup> CD4<sup>+</sup> T cells treated with CCR5-CRISPR, as measured  
117 by HIV-1 p24 antigen in supernatant.

118

119 ***HIV-1 resistance of CCR5 CRISPR-Cas9-modified CD34<sup>+</sup> differentiated***  
120 ***macrophages to CCR5 tropic HIV-1***

121 R5-tropic HIV-1 strains (e.g., HIV-1<sub>BaL</sub>) are historically referred to as macrophage-  
122 tropic (M-tropic), as they are capable of infecting macrophages by utilizing the CCR5 co-  
123 receptor in addition to the CD4 receptor. Thus, we evaluated the antiviral efficacy of  
124 CRISPR-mediated gene disruption of CCR5 in primary macrophages that were derived  
125 from CD34<sup>+</sup> hematopoietic stem and progenitor (HSPC) cells. Human CD34<sup>+</sup> HSPCs  
126 were isolated from cord blood, transduced with the CCR5-CRISPR or control CRISPR  
127 lentiviral vectors, and sorted by FACS based on TagRFP expression (**Figure 2A**). The  
128 TagRFP-expressing CD34<sup>+</sup> cells were differentiated into macrophages, as described in  
129 the Methods and Materials section (**Figure 2B**). Macrophages were then challenged with  
130 HIV-1<sub>BaL</sub> and evaluated for viral replication by p24 ELISA measurement of the  
131 supernatants over 28 days. HIV-1 replication was suppressed at all time points in  
132 macrophages treated with CCR5-CRISPR relative to control, with p24 antigen levels  
133 reduced greater than 10-fold at days 3, 7, and 21, greater than 25-fold in viremia at day  
134 14, and greater than 5-fold at day 28 (**Figure 2C**). These results demonstrate that  
135 CRISPR-mediated disruption of *CCR5* in CD34<sup>+</sup> HSPC-derived macrophages confers  
136 resistance to HIV-1 infection and replication.



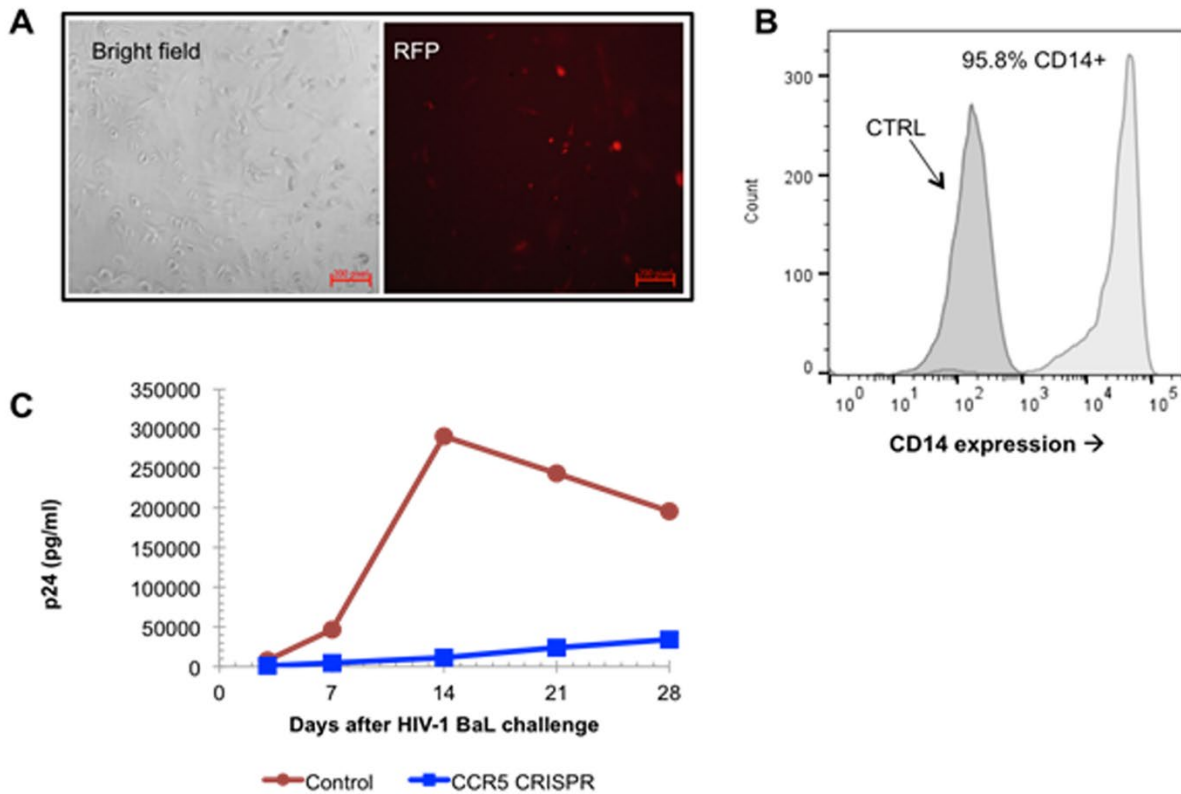

137

138 **Figure 2. Hematopoietic differentiation and HIV resistance of macrophages from**

139 **CRISPR-Cas9-CCR5 modified HSPCs. A.** Morphology of macrophages generated from

140 parental and CRISPR modified HSPCs. RFP indicated cells transduced with the CCR5-

141 CRISPR vectors in differentiated macrophages. **B.** Flow cytometric analysis of

142 macrophage-specific markers in macrophages generated from CRISPR modified HSPCs.

143 **C.** Resistance of macrophage from CCR5-CRISPR modified HSPCs to HIV-1 virus

144 infection comparing to unmodified cells.

145

146 **CRISPR-Cas9 gene disruption of CXCR4 confers resistance to T-tropic HIV-1 in cell**

147 **lines and primary T cells**

148           Although CRISPR-mediated disruption of the *CCR5* gene may confer resistance  
149 to R5-tropic HIV-1, it may not inhibit strains that utilize the CXCR4 (X4-tropic) or both  
150 CXCR4 and CCR5 co-receptors (dual-tropic). Thus, we designed guide CRISPR RNA  
151 sequences targeting *CXCR4* as an approach for inhibiting X4-tropic HIV-1. We first  
152 compared the efficacy of different sgRNA for each target, delivered using lentiviral vectors  
153 to disrupt surface CXCR4 expression on Jurkat CD4<sup>+</sup> T cells. Flow cytometry analysis  
154 revealed a significant decrease in surface CXCR4 expression, with 99.3% CXCR4<sup>+</sup> cells  
155 in control-CRISPR cells only 15.4% CXCR4<sup>+</sup> cells transduced with CXCR4-CRISPR  
156 (**Figure 3A**). These observations were corroborated with analysis of editing of genome  
157 DNA by Surveyor nuclease assay, with 30.4% allelic disruption after CXCR4-CRISPR  
158 transduction (**Figure 3B**). Next, we assessed the biological effects of *CXCR4* disruption  
159 on preventing replication of X4-tropic HIV-1 in human PBMCs. Over a 16-day time course  
160 following HIV-1<sub>NL4-3</sub> challenge, we observed significant resistance ( $p < 0.05$ ) to HIV  
161 replication in the CXCR4-CRISPR cells as measured by ELISA of supernatant at the  
162 indicated time points (**Figure 3C**). Collectively, these experiments demonstrate the  
163 feasibility of using CRISPR/Cas9 to engineer HIV resistant cells by targeting the *CCR5*  
164 and *CXCR4* host receptor genes.

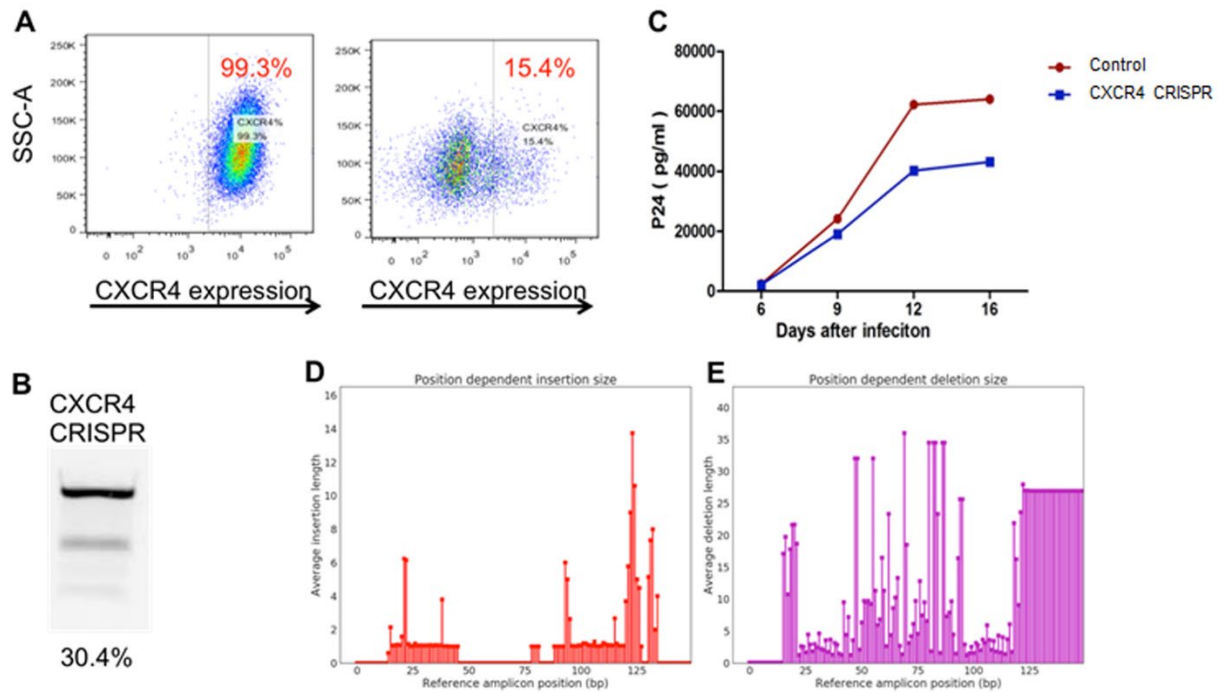

165

166 **Figure 3. CRISPR/Cas9 gene disruption of CXCR4 in Jurkat T cells.** **A.** Jurkat cells  
167 were transduced with CXCR4 CRISPR or control vector and analyzed for CXCR4 surface  
168 expression by flow cytometry. **B.** Surveyor nuclease assay detects indels in CXCR4  
169 CRISPR modified Jurkat cells. **C.** HIV-1<sub>NL4-3</sub> replication in PBMC treated with CXCR4  
170 CRISPR, as measured by p24 in supernatant. **D.** Insertions or **E.** Deletions within the  
171 CXCR4 target site, as detected by Sanger sequencing and analyzed by inference of  
172 CRISPR edits (ICE). Insertions range from 1-14 bp while deletions range from 1-36 bp,  
173 as indicated by the y-axes.

174

175 **CXCR4 CRISPR-edited primary CD4<sup>+</sup> T cells are selected in Hu-PBMC mice after**  
176 **infection with HIV-1 virus**

177 While lentiviral delivery of the CRISPR-Cas9 system can achieve on-target efficacy,  
178 constitutive expression of the Cas9 and sgRNA components is also associated with high  
179 frequencies of off-target editing and is thus not suitable for clinical applications<sup>37</sup>. As an  
180 alternative delivery system, recombinant Cas9 protein may be complexed with the guide  
181 RNA for *ex vivo* delivery into cells by transient transfection or electroporation. The  
182 Cas9/gRNA ribonucleoprotein (RNP) provides burst-like kinetics that maximize the on-  
183 target efficiency, while minimizing less kinetically favorable off-target events<sup>38</sup>. Thus, we  
184 elected to deliver the Cas9 RNP to human primary CD4<sup>+</sup> T cells using MaxCyte STX  
185 electroporation (MaxCyte, Inc.), as a similar approach has been previously demonstrated  
186 for the preparation of zinc finger nuclease-mediated gene-edited T cells at a clinical  
187 scale<sup>39</sup>. Specifically, we utilized the Alt-R CRISPR-Cas9 system (Integrated DNA  
188 Technologies, Inc.), which consists of spCas9 recombinant protein complexed with a  
189 trans-activating crRNA (tracrRNA) and a chemically modified CRISPR RNA (crRNA) that  
190 is specific for *CXCR4*. We utilized the human peripheral blood mononuclear cell (hu-  
191 PBMC) NSG mouse model to evaluate whether knockout of *CXCR4* in CD4<sup>+</sup> T cells could  
192 protect cells *in vivo* from infection with X4-tropic HIV-1<sub>NL4-3</sub> (**Figure 4A**). Two days after  
193 MaxCyte electroporation of AltR-CXCR4 CRISPR into human primary CD4<sup>+</sup> T cells, flow  
194 cytometry analysis revealed that the subpopulation of CXCR4-negative T cells had  
195 increased from 2.3% to 20.2% in the CXCR4-CRISPR group (**Figure 4B**). Editing of the  
196 *CXCR4* alleles was also confirmed by Surveyor assay, which revealed 46% gene  
197 disruption (**Figure 4C**). Mice were analyzed for engraftment at 14 days after  
198 transplantation and were challenged with HIV-1<sub>NL4-3</sub> at 28 days after transplantation. At  
199 two weeks after infection, we observed an increase in *CXCR4* gene disruption in T cells

200 collected from the CXCR4-CRISPR mice, suggesting the enrichment of CXCR4-negative  
201 cells by the selective pressure of X4-tropic HIV-1 infection (**Figure 4D**). Notably, at the  
202 same time point, the mice engrafted with CXCR4 knockout cells exhibited ~30-fold lower  
203 levels of plasma viremia than in the mock-treated mice (**Figure 4E**).

204 At 12 weeks after transplantation (i.e., 8 weeks after HIV-1<sub>NL4-3</sub> challenge), the  
205 experiment was terminated, the CXCR4-CRISPR modified cells were collected from the  
206 spleens of humanized mice (**Figure 4F**). We analyzed the gene modification level of  
207 CXCR4-CRISPR in the mice spleens by Sanger sequencing followed by analysis using  
208 inference of CRISPR edits (ICE), which revealed 37.0% of CXCR4 alleles were disrupted  
209 (**Figure 4G**). Moreover, the mice engrafted with CXCR4 knockout cells exhibited  
210 significantly higher levels of CD4<sup>+</sup> T cells in the spleen (22.5% CXCR4-CRISPR or 0.2%  
211 mock-treated) than to the mice that received mock-treated cells (**Figure 4H**). These  
212 results indicate that CRISPR-mediated gene disruption of CXCR4 protects CD4<sup>+</sup> T cells  
213 *in vivo* from infection of X4-tropic HIV-1 and virus-induced cell death.

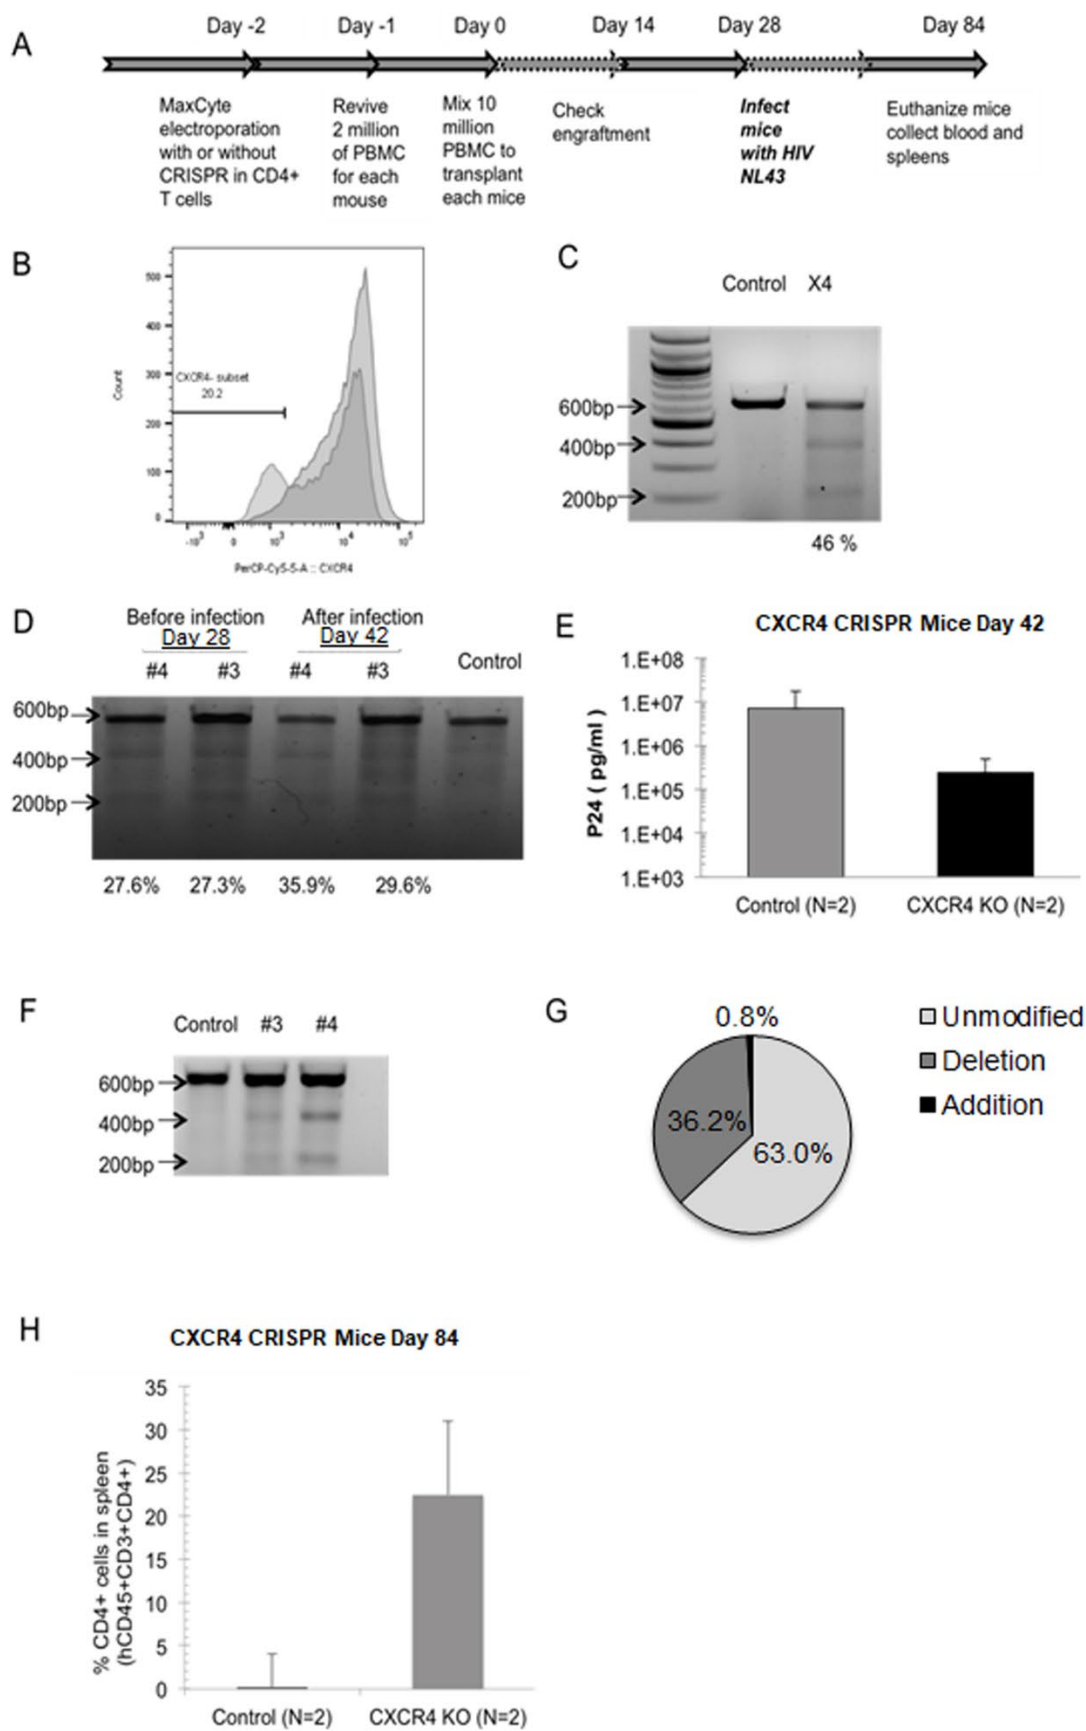

215 **Figure 4. Positive selection for CXCR4 knockout cells by HIV-1<sub>NL4-3</sub> infection in hu-**  
216 **PMBC** **A.** Schematic of the timeline of building hu-PBMC mice model and HIV infection  
217 by using mixed human primary PBMC with CXCR4 CRISPR modified CD4<sup>+</sup> T cells. **B.**  
218 Cell surface CXCR4 co-receptor knockout in CD4<sup>+</sup> T cells after MaxCyte electroporation  
219 of CXCR4 guide RNAs and Cas9 RNPs. Cells were fixed in 4% formaldehyde and  
220 analyzed by flow cytometry 48 hours after transfection. **C.** Surveyor assay detection of  
221 the allelic disruption of *CXCR4* gene in the CXCR4 CRISPR modified cells. **D.** Surveyor  
222 assay detection of the allelic disruption of *cxcr4* gene in the PBMC from CXCR4 CRISPR  
223 modified cells transplanted mice. Mice whole blood were collected by retro-orbital  
224 bleeding before HIV-1<sub>NL4-3</sub> infection (4 weeks after transplantation) and 2 weeks after HIV-  
225 1<sub>NL4-3</sub> infection (6 weeks after transplantation). **E.** qPCR was performed using plasma  
226 from hu-PBMC mice. Mice whole blood was collected by retro-orbital bleeding 2 weeks  
227 after HIV-1<sub>NL4-3</sub> infection (6 weeks after transplantation). Data were presented by  
228 comparing two groups of mice which were transplanted by using the control and CXCR4  
229 CRISPR modified cells. **F.** Surveyor assay represent the allelic disruption of *cxcr4* gene  
230 in the spleen cells from humanized mice transplanted by using CXCR4 CRISPR modified  
231 or unmodified cells (control). **G.** Quantitative analysis of indels generated by CXCR4  
232 CRISPR in spleen cells in humanized mice. **H.** Flow cytometry analysis of CD4<sup>+</sup> T cell  
233 numbers in mice spleen 12 weeks after transplantation by using CXCR4 CRISPR  
234 modified or unmodified cells (control).

235

236 **CCR5 and CXCR4 genome-disrupted confers primary T cells resistant broad HIV-**  
237 **1 infection**

238 Specifically, we utilized the Alt-R CRISPR-Cas9 system (Integrated DNA  
239 Technologies, Inc.), which consists of spCas9 recombinant protein complexed with a  
240 trans-activating crRNA (tracrRNA) and a chemically modified CRISPR RNA (crRNA) that  
241 is specific for either *CCR5* or *CXCR4* (referred hereafter as R5X4-CRISPR). While  
242 CRISPR-mediated disruption of *CCR5* confers resistance to R5-tropic HIV-1, and  
243 disruption of *CXCR4* confers resistance to X4-tropic HIV-1, it may be necessary to edit  
244 both surface receptors to create resistance to all HIV-1 infection. To test this hypothesis,  
245 we prepared Cas9 RNP complexes with *CCR5* and *CXCR4* gRNAs (referred hereafter as  
246 R5X4-CRISPR) following manufacturer's instructions. After transfection of the R5X4-  
247 CRISPR system into primary CD4<sup>+</sup> T cells, we first analyzed the knockout efficacy of  
248 *CCR5* and *CXCR4* receptors on the cell surface. Analysis by flow cytometry revealed that  
249 the gene-modified cells exhibited a decrease in *CCR5* surface expression from 88.7% in  
250 control cells to 54.9% (**Figure 5A**) and from 77.1% to 26.3% in *CXCR4* expression  
251 (**Figure 5B**). In total, the proportion of dual-positive *CCR5*<sup>+</sup>*CXCR4*<sup>+</sup> cells decreased from  
252 85.2% to 36.8%, while levels of dual-negative *CCR5*<sup>-</sup>*CXCR4*<sup>-</sup> cells increased from 10.6%  
253 to 49.8% (**Figure S2**). This demonstrates that transient delivery of CRISPR/Cas9 is  
254 effective in knocking out both of the co-receptors that are required for HIV infection in  
255 human primary CD4<sup>+</sup> T cells.

256 We next sought to determine whether CD4<sup>+</sup> T cells with disrupted *CCR5* and  
257 *CXCR4* alleles would become resistant to HIV-1 infection. We challenged the R5X4-  
258 CRISPR-modified primary CD4<sup>+</sup> T cells with HIV-1 virus that utilized the *CCR5* co-  
259 receptor (HIV-1<sub>BaL</sub>), the *CXCR4* co-receptor (HIV-1<sub>NL4-3</sub>), or either the *CCR5* or *CXCR4*  
260 co-receptors (HIV-1<sub>89.6</sub>). Analysis of indels by Surveyor assay revealed that slight



261 increase in disruption of the *CCR5* allele was observed after challenge with R5-tropic HIV-  
262 1<sub>BaL</sub> (**Figure 5C**). Similarly, gene disruption of the *CXCR4* allele was increased after  
263 infection with X4-tropic HIV-1<sub>NL4-3</sub> (**Figure 5D**). Interestingly, cells that had surfaced  
264 expression of *CCR5* but not of *CXCR4* (*CCR5*<sup>+</sup>*CXCR4*<sup>-</sup>) were enriched after challenge  
265 with HIV-1<sub>NL4-3</sub> (19.5%), but not after challenge with the other two strains that can utilize  
266 the *CCR5* coreceptor (1.1% for HIV-1<sub>BaL</sub> and 2.3% for HIV-1<sub>89.6</sub>). Likewise, cells with  
267 surface expression of *CXCR4* but not of *CCR5* (*CCR5*<sup>-</sup>*CXCR4*<sup>+</sup>) were enriched after  
268 challenge with HIV-1<sub>BaL</sub> (8.8%), but not after challenge with strains that may infect via the  
269 *CXCR4* co-receptor (1.9% for HIV-1<sub>NL4-3</sub> and 3.2% for HIV-1<sub>89.6</sub>). Most notably, the *CCR5*<sup>-</sup>  
270 *CXCR4*<sup>-</sup> dual-negative subpopulation increased from 74.3% in the R5X4-CRISPR cells  
271 before HIV-1 challenge to 85.1% in the cells challenged with HIV-1<sub>89.6</sub>, demonstrating an  
272 enrichment of cells that lack both *CCR5* and *CXCR4* co-receptors after incubation with  
273 this dual-tropic HIV-1 strain (**Figure 5E**).

274 To ascertain possible off-target gene disruption after R5X4-CRISPR treatment, we  
275 examined three possible off-target sites for the *CCR5* sgRNA target sequence and three  
276 more for the *CXCR4* target sequence, as predicted by Cas-OFFinder. Each site was  
277 analyzed using Surveyor assay, but no increases in gene disruption were observed for  
278 any of the six predicted off-target sites, whereas clear gene disruption was observed for  
279 each of the two on-target sites (**Figure 5F, Table S1, S2**).

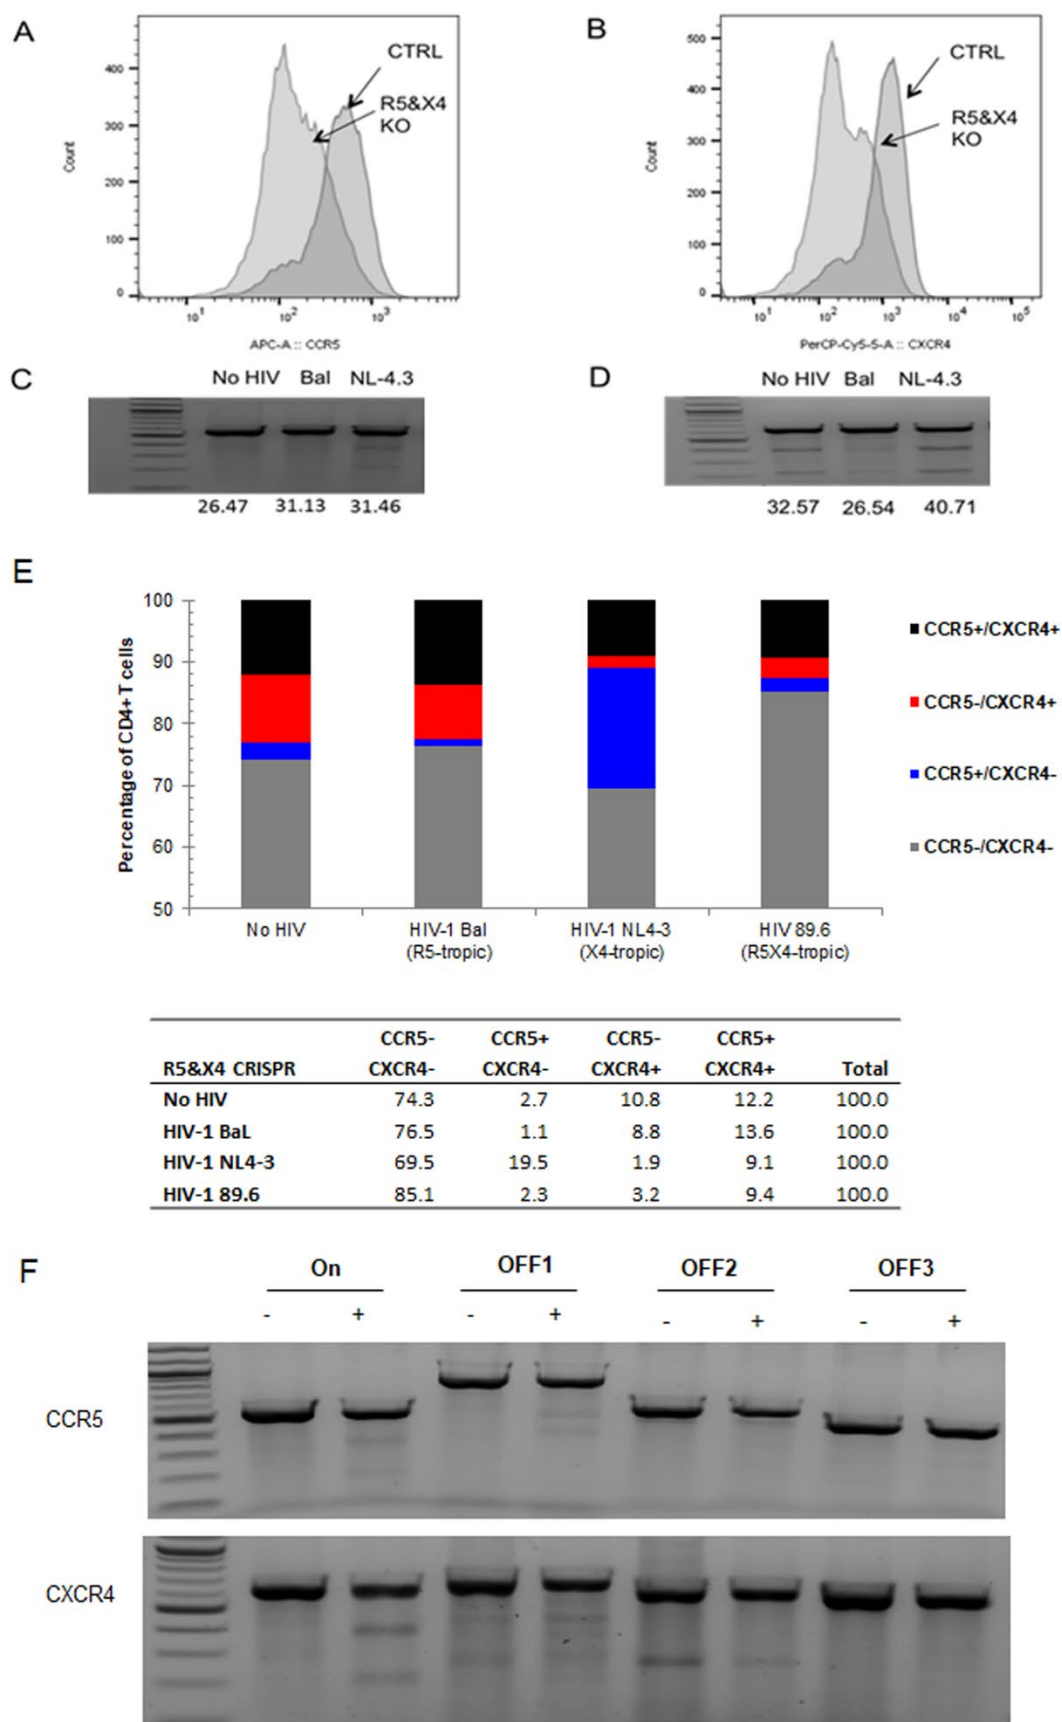

281 **Figure 5: Gene disruption of CCR5 and CXCR4 leading to HIV resistance in primary**  
282 **CD4<sup>+</sup> T cells using MaxCyte electroporation. A-B.** Human primary CD4<sup>+</sup> T cells were  
283 transfected with CCR5 and CXCR4 guide RNAs with Cas9 RNP by MaxCyte  
284 electroporation using the 'P4' setting. Elimination of cell surface expression of CCR5 (A)  
285 and CXCR4 (B) co-receptors are evaluated by flow cytometer. **C-D.** Surveyor assay  
286 tested CCR5 (C) and CXCR4 (D) allelic disruption in CCR5 and CXCR4 CRISPR treated  
287 cells are infected by HIV-1 virus (BaL or NL4-3). Cells were infected by using each HIV-  
288 1 virus (BaL or NL4-3) each strain after CD3/CD28 activation. 5 weeks after infection,  
289 cells were collected for genomic DNA extraction and Surveyor assay assessment. **E.**  
290 Flow cytometry analysis of CCR5 and CXCR4 expression on surface of CD4<sup>+</sup> T cells  
291 treated with CCR5 and CXCR4 CRISPR and then infected by using each HIV-1 virus  
292 strain (BaL-1, NL4-3 or 89.6) after CD3CD28 activation. Cells were collected 5 weeks  
293 after infection. The bar graph represents that in the CCR5 and CXCR4 CRISPR treated  
294 cells, percentage of CCR5<sup>-</sup>CXCR4<sup>-</sup> cells (gray bar), CCR5<sup>+</sup>CXCR4<sup>-</sup> (blue bar), CCR5<sup>-</sup>  
295 CXCR4<sup>+</sup> (red bar) and CCR5<sup>+</sup>/CXCR4<sup>+</sup> cells (black bar) were compared after difference  
296 strain infection. The table graph represents that in the CCR5 and CXCR4 CRISPR treated  
297 cells, percentage of CCR5<sup>-</sup>CXCR4<sup>-</sup> cells, CXCR4<sup>+</sup>CCR5<sup>-</sup> cells, CXCR4<sup>-</sup>CCR5<sup>+</sup> cells, and  
298 CXCR4<sup>+</sup>CCR5<sup>+</sup> cells were compared after difference strain infection. **F.** Off target sites  
299 predicted by Cas-OFFinder. Top three off target gene were analyzed by Surveyor assay  
300 in the CCR5 and CXCR4 CRISPR treated cells.

301

302 **Poor engraftment of R5X4-CRISPR knockout CD4<sup>+</sup> T cells in lymphoid tissues in**  
303 **Hu-PBMC mice**

304 As shown in Figure 5, knockout of both CCR5 and CXCR4 co-receptors is  
305 necessary to block infection from R5 and X4-tropic HIV-1 strains. Thus, we tested this the  
306 R5X4-CRISPR approach in hu-PBMC NSG mice with CRISPR-induced disruption of both  
307 *CCR5* and *CXCR4*. (**Figure 6A**) After transfection of the R5X4-CRISPR RNP complex  
308 into primary CD4<sup>+</sup> T cells by using MaxCyte electroporation system, we first analyzed the  
309 knockout efficacy of CCR5 and CXCR4 receptors on the cell surface. The proportion of  
310 dual-negative CCR5<sup>-</sup>CXCR4<sup>-</sup> cells increased from 21.8% to 49.0% (**Figure 6B**). Editing  
311 of the CCR5 and CXCR4 alleles was also confirmed by Surveyor assay, which revealed  
312 22.03% and 32.03% gene disruption (**Figure 6C**).

313 First, we analyzed the engraftment of the gene-modified cells. From analysis of  
314 peripheral blood in the hu-PBMC mice, there were similar levels of human CD45<sup>+</sup>  
315 lymphocytes or other surface markers, including CD3, CD4, CD8, CXCR4, and CCR5  
316 between the dual CRISPR and control mouse groups (**Figure 6D**). However, we also  
317 evaluated engraftment in primary lymphoid tissues and lung to assess the homing and  
318 persistence of the CRISPR-modified cells. In the spleen, we observed slightly lower levels  
319 of CD45<sup>+</sup> human cells, CD45<sup>+</sup>CD3<sup>+</sup> T cells, CD45<sup>+</sup>CD3<sup>+</sup>CD4<sup>+</sup> T cells,  
320 CD45<sup>+</sup>CD3<sup>+</sup>CD4<sup>+</sup>CCR5<sup>+</sup> T cells, and CD45<sup>+</sup>CD3<sup>+</sup>CD4<sup>+</sup>CXCR4<sup>+</sup> T cells in the R5X4-  
321 CRISPR-treated mice than in controls, although none of these differences was statistically  
322 significant (**Figure 6D**). Similar trends were also observed in the lung, although statistical  
323 significance was not met. However, in the bone marrow, the R5X4 mice had statistically  
324 significant ( $p < 0.05$ ) lower levels of human CD45<sup>+</sup> cells and CD45<sup>+</sup>CD3<sup>+</sup> T cells, as well  
325 as similar trends of slightly lower levels of CD4<sup>+</sup>, CCR5<sup>+</sup>, and CXCR4<sup>+</sup> T cells (**Figure**  
326 **6D**). These results suggest that CRISPR-mediated knockout of *CCR5* and *CXCR4* may

- 327 alter the homing, persistence, and expansion of these cells into the bone marrow and  
328 potentially other lymphoid tissues after transplantation.

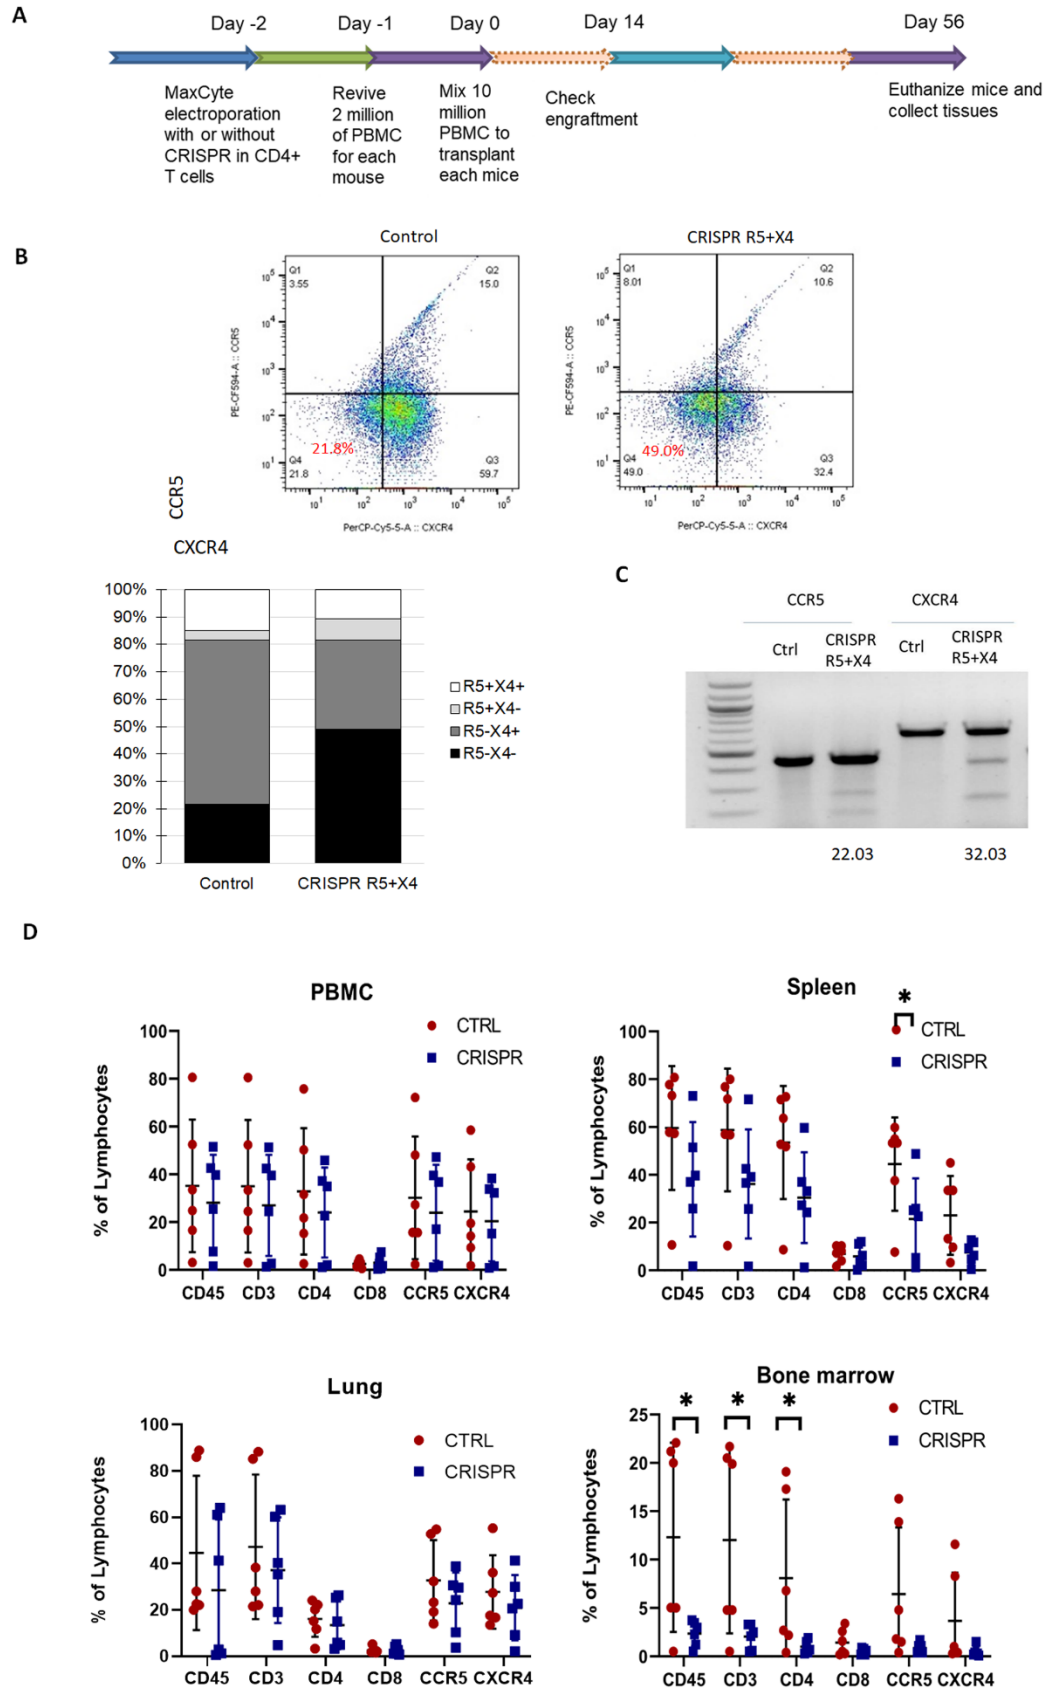

330 **Figure 6. Bio-distribution of CCR5- and CXCR4-CRISPR knockout CD4<sup>+</sup> T cells in**  
331 **Hu-PBMC mice tissues.** **A.** Schematic of the timeline of building hu-PBMC mice model  
332 by using mixed human primary PBMC with CXCR4 CRISPR modified CD4<sup>+</sup> T cells. **B.**  
333 Surveyor assay detection of CCR5 and CXCR4 allelic disruption in CD4<sup>+</sup> T cells after  
334 MaxCyte electroporation of CCR5 and CXCR4 guide RNAs and Cas9 RNPs. **C.** Cell  
335 surface CCR5 and CXCR4 co-receptor knockout in CD4<sup>+</sup> T cells after MaxCyte  
336 electroporation of CCR5 and CXCR4 guide RNAs and Cas9 RNPs. Cells were fixed in 4%  
337 formaldehyde and analyzed by flow cytometry 48 hours after transfection. **D.** Eight million  
338 of CRISPR modified or un-modified CD4<sup>+</sup> T cells with 2 million human PBMCs were  
339 transplanted into NSG mice. At final time point whole PBMCs, spleens, lungs, and bone  
340 marrow of all the mice from each group were harvested and cells were analyzed by flow  
341 cytometer. (n=6, \*p < 0.05)

342

## 343 Discussion

344 Owing to their essential roles as co-receptors for HIV entry and infection, the  
345 human CCR5 and CXCR4 chemokine receptors are attractive targets for gene disruption  
346 for creating HIV resistance. In this study, we investigated the versatility of the CRISPR-  
347 Cas9 in simultaneously editing both CCR5 and CXCR4 receptors human cells. We  
348 successfully disrupted CCR5 in CD4<sup>+</sup> T cell lines (**Figure 1**), primary CD4<sup>+</sup> T cells (**Figure**  
349 **5**), and CD34<sup>+</sup> HSPCs differentiated macrophages (**Figure 3**), which all led to R5 tropic  
350 HIV-1 virus resistance. Likewise, by disrupting CXCR4 in a CD4<sup>+</sup> T cell line (**Figure 3**),  
351 primary CD4<sup>+</sup> T cells (**Figure 5**), and in transplanted CD4<sup>+</sup> T cells in a humanized mouse  
352 model (**Figure 4**), we achieved X4 tropic HIV-1 virus resistance.

353 To generate CRISPR-modified CD4<sup>+</sup>CCR5<sup>-</sup>CXCR4<sup>-</sup> T cells, we utilized the  
354 MaxCyte electroporation system, which is a scalable system that has been used for  
355 clinical manufacturing of gene-modified cells<sup>39</sup>. Upon treatment with the Cas9 RNP  
356 complexes with *CCR5* and *CXCR4* gRNAs, we observed efficient gene editing for both  
357 receptors in primary CD4<sup>+</sup> T cells, resulting in approximately 50% CCR5<sup>-</sup>CXCR4<sup>-</sup> double-  
358 negative cells (**Figure S3**). The gene-modified cells were resistant to broad HIV-1  
359 infection and were selectively enriched by the selective pressure of HIV-1 infection  
360 (**Figure 4E**). In the hu-PBMC NSG mouse model, the CRISPR-modified cells were well  
361 tolerated, as the percentage of gene modified cells did not decrease over time in mice  
362 (**Figures 4D and 6D**). Moreover, in CXCR4-CRISPR humanized mice, X4-tropic HIV-1  
363 resistance resulted in the selective enrichment of CD4<sup>+</sup> T cells in spleen tissue compared  
364 to non-CRISPR mice (**Figure 4H**).

365 While CRISPR-mediated disruption of *CXCR4* was successful in reducing viremia  
366 and protecting CD4<sup>+</sup> T cells *in vivo* (**Figure 4**), we observed that levels of R5X4-CRISPR-  
367 modified CD4<sup>+</sup> T cells were significantly lower than unmodified controls in the bone  
368 marrow. CXCR4 is known to function as a surface receptor for cell homing, such as for  
369 the homing of hematopoietic stem and progenitor cells (HSPC) in the bone marrow,<sup>40</sup>  
370 while the CXCR4 antagonist AMD3100 (plerixafor) is used clinically to mobilize CD34<sup>+</sup>  
371 HSPCs from the bone marrow into the peripheral blood.<sup>41</sup> However, it is unknown whether  
372 gene disruption of *CXCR4* would abate engraftment of CD4<sup>+</sup> T cells in lymphoid organs.  
373 Previous studies have used zinc-finger nucleases to disrupt *CXCR4*<sup>25,26</sup> or both *CCR5*  
374 and *CXCR4*<sup>29</sup> in CD4<sup>+</sup> T cells to create X4-tropic HIV-1 resistance in tissue culture and *in*  
375 *vivo*. Similar to our observations in Figure 4, these studies also showed decreases in HIV-



376 1 plasma viremia and protection of the modified CD4<sup>+</sup> T cells in hu-PBMC mouse models.  
377 However, these studies only evaluated CD4<sup>+</sup> T cells and viremia in the peripheral blood  
378 and spleen, with no analyses of the engraftment in the bone marrow or lung. The potential  
379 toxicity of disrupting *CXCR4* in HSPCs is well established<sup>42</sup>, but this possibility is not  
380 necessarily associated with CD4<sup>+</sup> T cells.

381 While gene disruption of *CCR5* continues to be evaluated clinically with promising  
382 results<sup>32</sup>, gene editing strategies for *CXCR4* have not advanced to the clinic. Moreover,  
383 unlike the naturally occurring *CCR5-Δ32* homozygous mutation, homozygous *CXCR4*  
384 knockouts are embryonic lethal in a murine model.<sup>43</sup> Based on our observations of  
385 reduced engraftment of T cells in bone marrow following CRISPR-mediated disruption of  
386 *CCR5* and *CXCR4*, it is not clear that this strategy would be viable in humans.

387

## 388 **Materials and Methods**

### 389 ***Cell lines and viruses***

390 CEM.NK<sup>R</sup> CCR5<sup>+</sup> cells (abbreviated as CEM-CCR5) and Jurkat cells are CD4<sup>+</sup> T  
391 lymphoblastic cell lines obtained from NIH AIDS Reagent Program (catalog #4376), which  
392 is cultured in RPMI 1640 media supplemented with 10% fetal bovine serum and 2 mM L-  
393 glutamine. Human embryonic kidney (HEK) 293T cells were from ATCC (catalog #CRL-  
394 3216). HIV-1 infectious virus (HIV-1<sub>BaL</sub>, catalog #510; HIV-1<sub>89.6</sub>, catalog #1966) and  
395 molecular clone plasmid (HIV-1<sub>NL4-3</sub>, catalog #114), were obtained from NIH AIDS  
396 Reagent Program.

### 397 ***PBMCs and primary CD4<sup>+</sup> T cells***

398 Human peripheral blood mononuclear cells (PBMCs) were isolated from leukocyte  
399 reduction system chambers (i.e., buffy cones), which were obtained from healthy human  
400 donors at the City of Hope Amini Apheresis Center (Duarte, CA). PBMCs were separated  
401 from the by centrifugation with Ficoll-Paque Premium (BD). Primary human CD4<sup>+</sup> T cells  
402 were further purified and enriched by the CD4<sup>+</sup> T cell isolation Kit (Miltenyi Biotech)  
403 according to the manufacturer's instructions and then maintained in complete RPMI  
404 medium supplemented with 10% FBS.

### 405 ***Guide RNA design and CRISPR-Cas9 lentiviral vector constructs***

406 Guide RNA sequences for the *ccr5* and *cxcr4* target sites were designed using the  
407 computational tool originally described by Hsu, et al.<sup>35</sup> The pL-CRISPR-SFFV-tRFP  
408 plasmid was obtained from Addgene (Plasmid #57826) and originally deposited by the  
409 Ebert lab.<sup>34</sup>

#### 410 ***Lentiviral vector production***

411 Lentiviral vectors were packaged in HEK 293T cells by calcium phosphate precipitation.  
412 Briefly, 15 µg of transfer plasmid was cotransfected with helper plasmids (15 µg of pCMV-  
413 Pol/Gag, 5 µg of pCMV-Rev, and 5 µg of pCMV-VSVG) into HEK 293T cells with 90–95%  
414 confluency per 10-cm dish. Viral supernatant was harvested 48 hours post-transfection,  
415 concentrated by ultracentrifugation, and stored at –80°C until use. Viral titers were  
416 determined by transduction of HT1080 cells and analyzed for EGFP expression with  
417 fluorescence-activated cell sorting analysis.

#### 418 ***Flow cytometry analysis***

419 To analyze cell surface expression of CCR5 and CXCR4, cells were incubated with an  
420 APC-conjugated mouse anti-human CCR5 (Becton Dickinson), PerCP-Cy5-conjugated  
421 mouse anti-human CXCR4 (Becton Dickinson) for 30 min at 4 °C. Cells then were washed  
422 twice with FACS buffer (PBS containing 1% BSA and 0.02% NaN<sub>3</sub>) and then washed  
423 twice with FACS buffer and fixed with 2% formaldehyde. FACS analysis was performed  
424 on Fortessa (Becton Dickinson, Mountain View, CA).

425 To isolate Tag-RFP cell populations from total CEM-CCR5 cells transduced with lentiviral  
426 vectors expressing Cas9 NLS and sgRNAs, cells were sorted using an Aria SORP cell  
427 sorter (Becton Dickinson).

#### 428 ***Surveyor nuclease assay***

429 To detect indels generated by CRISPR, genomic DNA from the CRISPR modified or  
430 unmodified cells was extracted using QiAmp DNA mini Kit (Qiaagen) and assayed by  
431 Surveyor nuclease assay (Transgenomic).

### 432 ***HIV-1 in vitro challenge assay***

433 To test whether CCR5 and CXCR4 gene-disrupted cells were resistant to HIV-1 infection,  
434 cells were infected with R4-tropic HIV-1<sub>NL-4.3</sub>, R5-tropic HIV-1<sub>BaL</sub>, or dual-tropic HIV-1<sub>89.6</sub>  
435 at the MOI between 0.01-0.1 at 37°C, 5% CO<sub>2</sub> for overnight. Cells were then washed  
436 twice with PBS and re-suspended in fresh complete medium. After the challenge, cells  
437 and culture supernatants were collected every 3 days and replenished with fresh medium  
438 for a total of 28 days. Levels of HIV-1 gag p24 in culture supernatants were measured by  
439 ELISA as instructed by manufacturer (PerkinElmer).

### 440 ***Generation of adult HSPC-derived macrophages.***

441 Cord blood was purchase from StemCyte (Baldwin Park, CA) with approval from the City  
442 of Hope Institutional Review Board (IRB 17155). Sorted CD34<sup>+</sup> HSPCs were cultured in  
443 Iscove's modified Dulbeco's media with 20% FBS supplemented with 2 mmol/l of  
444 glutamine, 25 ng/ml of stem cell factor (Stemcell Tech), 30 ng/ ml of Flt3-L (PeproTech),  
445 30 ng/ml of interleukin-3 (Gibco), and 30 ng/ml of macrophage colony stimulating factor  
446 (PeproTech, Rocky Hill, NJ) for 10 days for guided differentiation to monocytes and were  
447 then switched to DMEM with 10% FBS supplemented with 2 mmol/l of glutamine, 10 ng/ml  
448 of granulocyte macrophage colony stimulating factor (PeproTech), and 10 ng/ml of  
449 macrophage colony stimulating factor (PeproTech) for 5 days for activation into  
450 macrophages. Adherent macrophage cells were collected for HIV challenge experiments.  
451 The purity of cells was typically greater than 90% CD14<sup>+</sup> based on fluorescence-activated  
452 cell sorting analysis.

### 453 ***Primary CD4<sup>+</sup> T cell electroporation***

454 The transfection of primary CD4<sup>+</sup> T cells was performed on MaxCyte STX. 2×10<sup>7</sup> primary  
455 CD4<sup>+</sup> T cells were centrifuged and washed twice with 1x PBS, and the cell were re-  
456 suspended with 100 µl prepared EP buffer and Cas9 NLS and chemically modified guide  
457 RNA with tracrRNA complex ordered form IDT. The mixture was then transferred to the  
458 OC-100 cuvette and electro-transfected with MaxCyte STX programs. After transfection,  
459 the cells were transferred to a CD3/ CD28 coated six well plate and cultured with RPMI  
460 1640 supplemented with 10% FBS, and IL-2 (100 IU/ml).

#### 461 ***Humanized PBMC (hu-PBMC) NSG mouse model***

462 NOD.Cg-*Prkdcscid* IL2rgtm1Wjl/SzJ (NSG) mice were obtained from The Jackson  
463 Laboratory (Bar Harbor, ME) and bred at the City of Hope Animal Resources Center  
464 according to the protocols approved by the Institutional Animal Care and Use Committee  
465 of the City of Hope (IACUC 16095). Adult NSG mice at age of 8–10 weeks old were  
466 transplanted with human PBMCs via intraperitoneal injection. Specifically, each mouse  
467 received 2.0 × 10<sup>6</sup> human PBMCs mixed with 8.0 × 10<sup>6</sup> CRISPR modified or un-modified  
468 human CD4<sup>+</sup> T cells.

#### 469 ***HIV-1 qRT-PCR***

470 HIV-1 viral RNA was extracted from 20-50 ul of plasma using QIAamp Viral RNA mini kit  
471 (Qiagen). qRT-PCR was performed using a TaqMan Fast Virus 1-Step Master Mix,  
472 according to the manufacturer's instructions (Applied Biosystems, Foster City, CA). The  
473 primers used were LTR-F (5'-GCCTCAATAAAGCTTGCCTTGA-3') and LTR-R (5'-  
474 GGCGCCACTGCTAGAGATTTT-3'), along with a probe (5'-

475 FAM/AAGTAGTGTGTGCCCGTCTGTTGTGTGACT-3'). Assay was performed using  
476 automated CFX96 Touch™ Real Time PCR Detection System (Bio-Rad).

#### 477 ***Off-target analysis***

478 Cas-OFFinder was employed to find potential OTSs with limitation of three-base  
479 mismatched sequences. From the resulting off-targets, OTSs only in gene-coding regions  
480 were selected and Surveyor nuclease assayed (Surveyor Mutation Detection Kit;  
481 Transgenomics).

#### 482 ***Deep sequencing and CRISPResso analysis***

483 Target loci were amplified by the specific primers. Before sequencing on an Illumina  
484 HiSeq 2500 platform, the amplicons were purified, end-repaired and connected with  
485 sequencing primer. For the sequences gained by sequencing, low quality and joint  
486 pollution data were removed to obtain reliable target sequences (clean reads) for  
487 subsequent analysis. The corresponding Read1 and Read2 (sequences gained from the  
488 5'- and 3'- ends, respectively) were spliced. Analysis of indels was performed using the  
489 CRISPResso tool <sup>44</sup>.

490

#### 491 **Acknowledgements**

492 This research was supported by grants from the California HIV/AIDS Research Program  
493 (CHRP) IDEA (Innovative Developmental Exploratory Award) in Basic Biomedical  
494 Sciences (ID13-BRI-540) to J.C.B, City of Hope Analytic Cytometry Core, City of Hope  
495 Animal Resource Center. The following reagents were obtained through the NIH AIDS  
496 Reagent Program, Division of AIDS, NIAID, NIH: Jurkat cells, CEM.NK<sup>R</sup> CCR5+ cells from

497 Dr. Alexandra Trkola<sup>36</sup>; HIV-1<sub>Ba-L</sub> from Dr. Suzanne Gartner, Dr. Mikulas Popovic and Dr.  
498 Robert Gallo<sup>45</sup>; HIV-1<sub>89.6</sub> Virus from Dr. Ronald Collman<sup>46</sup>; and HIV-1<sub>NL4-3</sub> Infectious  
499 Molecular Clone (pNL4-3) from Dr. Malcolm Martin<sup>47</sup>. Cord blood from anonymous donors  
500 was purchased from StemCyte.

501

## 502 **Authors' contributions**

503 JB, SL: Conceived and designed the experiments.SL: Performed the experiments. LH:  
504 Helped with mouse tissue collection. JB, SL: Analyzed the data. SL, JB: Wrote the  
505 paper. All authors read and approved the final manuscript.

506

507 **References**

- 508 1. Collaborators, G.H. (2016). Estimates of global, regional, and national incidence,  
509 prevalence, and mortality of HIV, 1980-2015: the Global Burden of Disease Study  
510 2015. *Lancet HIV* 3, e361-e387. 10.1016/S2352-3018(16)30087-X.
- 511 2. Deeks, S.G. (2011). HIV infection, inflammation, immunosenescence, and aging.  
512 *Annual review of medicine* 62, 141-155. 10.1146/annurev-med-042909-093756.
- 513 3. Deeks, S.G., Lewin, S.R., Ross, A.L., Ananworanich, J., Benkirane, M., Cannon,  
514 P., Chomont, N., Douek, D., Lifson, J.D., Lo, Y.R., Kuritzkes, D., et al. (2016).  
515 International AIDS Society global scientific strategy: towards an HIV cure 2016.  
516 *Nat Med* 22, 839-850. 10.1038/nm.4108.
- 517 4. Li, S., and Burnett, J. (2018). Biomolecular Therapeutics for HIV. *Biomedical*  
518 *Applications of Functionalized Nanomaterials: Concepts, Development and*  
519 *Clinical Translation*, 541-567. 10.1016/B978-0-323-50878-0.00018-5.
- 520 5. Moyle, G.J., Wildfire, A., Mandalia, S., Mayer, H., Goodrich, J., Whitcomb, J., and  
521 Gazzard, B.G. (2005). Epidemiology and predictive factors for chemokine receptor  
522 use in HIV-1 infection. *The Journal of infectious diseases* 191, 866-872.  
523 10.1086/428096.
- 524 6. Zaitseva, M., Blauvelt, A., Lee, S., Lapham, C.K., Klaus-Kovtun, V., Mostowski, H.,  
525 Manischewitz, J., and Golding, H. (1997). Expression and function of CCR5 and  
526 CXCR4 on human Langerhans cells and macrophages: implications for HIV  
527 primary infection. *Nat Med* 3, 1369-1375. 10.1038/nm1297-1369.
- 528 7. Liu, R., Paxton, W.A., Choe, S., Ceradini, D., Martin, S.R., Horuk, R., MacDonald,  
529 M.E., Stuhlmann, H., Koup, R.A., and Landau, N.R. (1996). Homozygous defect in



- 530 HIV-1 coreceptor accounts for resistance of some multiply-exposed individuals to  
531 HIV-1 infection. *Cell* **86**, 367-377.
- 532 8. Paxton, W.A., Martin, S.R., Tse, D., O'Brien, T.R., Skurnick, J., VanDevanter, N.L.,  
533 Padian, N., Braun, J.F., Kotler, D.P., Wolinsky, S.M., and Koup, R.A. (1996).  
534 Relative resistance to HIV-1 infection of CD4 lymphocytes from persons who  
535 remain uninfected despite multiple high-risk sexual exposure. *Nat Med* **2**, 412-417.
- 536 9. Allers, K., Hutter, G., Hofmann, J., Loddenkemper, C., Rieger, K., Thiel, E., and  
537 Schneider, T. (2011). Evidence for the cure of HIV infection by  
538 CCR5Delta32/Delta32 stem cell transplantation. *Blood* **117**, 2791-2799.  
539 10.1182/blood-2010-09-309591.
- 540 10. Hutter, G., Nowak, D., Mossner, M., Ganepola, S., Mussig, A., Allers, K., Schneider,  
541 T., Hofmann, J., Kucherer, C., Blau, O., Blau, I.W., et al. (2009). Long-term control  
542 of HIV by CCR5 Delta32/Delta32 stem-cell transplantation. *N Engl J Med* **360**, 692-  
543 698. 10.1056/NEJMoa0802905.
- 544 11. Gupta, R.K., Peppas, D., Hill, A.L., Galvez, C., Salgado, M., Pace, M., McCoy, L.E.,  
545 Griffith, S.A., Thornhill, J., Alrubayyi, A., Huyvoneers, L.E.P., et al. (2020).  
546 Evidence for HIV-1 cure after CCR5Delta32/Delta32 allogeneic haemopoietic  
547 stem-cell transplantation 30 months post analytical treatment interruption: a case  
548 report. *The lancet. HIV* **7**, e340-e347. 10.1016/S2352-3018(20)30069-2.
- 549 12. Hütter, G. (2014). More on shift of HIV tropism in stem-cell transplantation with  
550 CCR5 delta32/delta32 mutation. *N Engl J Med*.
- 551 13. Petz, L.D., Burnett, J.C., Li, H., Li, S., Tonai, R., Bakalinskaya, M., Shpall, E.J.,  
552 Armitage, S., Kurtzberg, J., Regan, D.M., Clark, P., et al. (2015). Progress toward

- 553 curing HIV infection with hematopoietic cell transplantation. *Stem cells and cloning :  
554 advances and applications* 8, 109-116. 10.2147/sccaa.s56050.
- 555 14. Kordelas, L., Verheyen, J., Beelen, D.W., Horn, P.A., Heinold, A., Kaiser, R.,  
556 Trenchel, R., Schadendorf, D., Dittmer, U., and Esser, S. (2014). Shift of HIV  
557 tropism in stem-cell transplantation with CCR5 Delta32 mutation. *N Engl J Med*  
558 371, 880-882. 10.1056/NEJMc1405805.
- 559 15. Li, L., Krymskaya, L., Wang, J., Henley, J., Rao, A., Cao, L.F., Tran, C.A., Torres-  
560 Coronado, M., Gardner, A., Gonzalez, N., Kim, K., et al. (2013). Genomic editing  
561 of the HIV-1 coreceptor CCR5 in adult hematopoietic stem and progenitor cells  
562 using zinc finger nucleases. *Molecular therapy : the journal of the American*  
563 *Society of Gene Therapy* 21, 1259-1269. 10.1038/mt.2013.65.
- 564 16. Perez, E.E., Wang, J., Miller, J.C., Jouvenot, Y., Kim, K.A., Liu, O., Wang, N., Lee,  
565 G., Bartsevich, V.V., Lee, Y.L., Guschin, D.Y., et al. (2008). Establishment of HIV-  
566 1 resistance in CD4+ T cells by genome editing using zinc-finger nucleases. *Nature*  
567 *biotechnology* 26, 808-816. 10.1038/nbt1410.
- 568 17. Yi, G., Choi, J.G., Bharaj, P., Abraham, S., Dang, Y., Kafri, T., Alozie, O.,  
569 Manjunath, M.N., and Shankar, P. (2014). CCR5 Gene Editing of Resting CD4(+)  
570 T Cells by Transient ZFN Expression From HIV Envelope Pseudotyped  
571 Nonintegrating Lentivirus Confers HIV-1 Resistance in Humanized Mice.  
572 *Molecular therapy. Nucleic acids* 3, e198. 10.1038/mtna.2014.52.
- 573 18. Wang, W., Ye, C., Liu, J., Zhang, D., Kimata, J.T., and Zhou, P. (2014). CCR5  
574 gene disruption via lentiviral vectors expressing Cas9 and single guided RNA

- 575 renders cells resistant to HIV-1 infection. *PloS one* 9, e115987.  
576 10.1371/journal.pone.0115987.
- 577 19. Ye, L., Wang, J., Beyer, A.I., Teque, F., Cradick, T.J., Qi, Z., Chang, J.C., Bao, G.,  
578 Muench, M.O., Yu, J., Levy, J.A., et al. (2014). Seamless modification of wild-type  
579 induced pluripotent stem cells to the natural CCR5Delta32 mutation confers  
580 resistance to HIV infection. *Proceedings of the National Academy of Sciences of*  
581 *the United States of America* 111, 9591-9596. 10.1073/pnas.1407473111.
- 582 20. Jin, L., Deng, Y., He, N., Wang, L., and Weng, M. (2018). Polyethylenimine-  
583 Mediated CCR5 Gene Knockout Using Transcription Activator-Like Effector  
584 Nucleases. *J Biomed Nanotechnol* 14, 546-552. 10.1166/jbn.2018.2545.
- 585 21. Yu, A.Q., Ding, Y., Lu, Z.Y., Hao, Y.Z., Teng, Z.P., Yan, S.R., Li, D.S., and Zeng,  
586 Y. (2018). TALENs-mediated homozygous CCR5Delta32 mutations endow CD4+  
587 U87 cells with resistance against HIV1 infection. *Molecular medicine reports* 17,  
588 243-249. 10.3892/mmr.2017.7889.
- 589 22. Xiao, Q., Chen, S., Wang, Q., Liu, Z., Liu, S., Deng, H., Hou, W., Wu, D., Xiong,  
590 Y., Li, J., and Guo, D. (2019). CCR5 editing by *Staphylococcus aureus* Cas9 in  
591 human primary CD4(+) T cells and hematopoietic stem/progenitor cells promotes  
592 HIV-1 resistance and CD4(+) T cell enrichment in humanized mice. *Retrovirology*  
593 16, 15. 10.1186/s12977-019-0477-y.
- 594 23. Kang, H., Minder, P., Park, M.A., Mesquitta, W.T., Torbett, B.E., and Slukvin, I.I.  
595 (2015). CCR5 Disruption in Induced Pluripotent Stem Cells Using CRISPR/Cas9  
596 Provides Selective Resistance of Immune Cells to CCR5-tropic HIV-1 Virus.  
597 *Molecular therapy. Nucleic acids* 4, e268. 10.1038/mtna.2015.42.

- 598 24. Xu, L., Yang, H., Gao, Y., Chen, Z., Xie, L., Liu, Y., Liu, Y., Wang, X., Li, H., Lai,  
599 W., He, Y., et al. (2017). CRISPR/Cas9-Mediated CCR5 Ablation in Human  
600 Hematopoietic Stem/Progenitor Cells Confers HIV-1 Resistance In Vivo. *Mol Ther*  
601 *25*, 1782-1789. [10.1016/j.ymthe.2017.04.027](https://doi.org/10.1016/j.ymthe.2017.04.027).
- 602 25. Wilen, C.B., Wang, J., Tilton, J.C., Miller, J.C., Kim, K.A., Rebar, E.J., Sherrill-Mix,  
603 S.A., Patro, S.C., Secreto, A.J., Jordan, A.P., Lee, G., et al. (2011). Engineering  
604 HIV-resistant human CD4+ T cells with CXCR4-specific zinc-finger nucleases.  
605 *PLoS Pathog* *7*, e1002020. [10.1371/journal.ppat.1002020](https://doi.org/10.1371/journal.ppat.1002020).
- 606 26. Yuan, J., Wang, J., Crain, K., Fearn, C., Kim, K.A., Hua, K.L., Gregory, P.D.,  
607 Holmes, M.C., and Torbett, B.E. (2012). Zinc-finger Nuclease Editing of Human  
608 *cxcr4* Promotes HIV-1 CD4+ T Cell Resistance and Enrichment. *Mol Ther* *20*, 849-  
609 859.
- 610 27. Wang, Q., Chen, S., Xiao, Q., Liu, Z., Liu, S., Hou, P., Zhou, L., Hou, W., Ho, W.,  
611 Li, C., Wu, L., et al. (2017). Genome modification of CXCR4 by *Staphylococcus*  
612 *aureus* Cas9 renders cells resistance to HIV-1 infection. *Retrovirology* *14*, 51.  
613 [10.1186/s12977-017-0375-0](https://doi.org/10.1186/s12977-017-0375-0).
- 614 28. Hou, P., Chen, S., Wang, S., Yu, X., Chen, Y., Jiang, M., Zhuang, K., Ho, W., Hou,  
615 W., Huang, J., and Guo, D. (2015). Genome editing of CXCR4 by CRISPR/cas9  
616 confers cells resistant to HIV-1 infection. *Scientific reports* *5*, 15577.
- 617 29. Didigu, C.A., Wilen, C.B., Wang, J., Duong, J., Secreto, A.J., Danet-Desnoyers,  
618 G.A., Riley, J.L., Gregory, P.D., June, C.H., Holmes, M.C., and Doms, R.W. (2014).  
619 Simultaneous zinc-finger nuclease editing of the HIV coreceptors *ccr5* and *cxcr4*

- 620 protects CD4+ T cells from HIV-1 infection. *Blood* 123, 61-69. 10.1182/blood-2013-  
621 08-521229.
- 622 30. Yu, S., Yao, Y., Xiao, H., Li, J., Liu, Q., Yang, Y., Adah, D., Lu, J., Zhao, S., Qin,  
623 L., and Chen, X. (2018). Simultaneous Knockout of CXCR4 and CCR5 Genes in  
624 CD4+ T Cells via CRISPR/Cas9 Confers Resistance to Both X4- and R5-Tropic  
625 Human Immunodeficiency Virus Type 1 Infection. *Human gene therapy* 29, 51-67.  
626 10.1089/hum.2017.032.
- 627 31. Tebas, P., Stein, D., Tang, W.W., Frank, I., Wang, S.Q., Lee, G., Spratt, S.K.,  
628 Surosky, R.T., Giedlin, M.A., Nichol, G., Holmes, M.C., et al. (2014). Gene editing  
629 of CCR5 in autologous CD4 T cells of persons infected with HIV. *N Engl J Med*  
630 370, 901-910. 10.1056/NEJMoa1300662.
- 631 32. Tebas, P., Jadowsky, J.K., Shaw, P.A., Tian, L., Esparza, E., Brennan, A.L., Kim,  
632 S., Naing, S.Y., Richardson, M.W., Vogel, A.N., Maldini, C.R., et al. (2021). CCR5-  
633 edited CD4+ T cells augment HIV-specific immunity to enable post-rebound control  
634 of HIV replication. *The Journal of clinical investigation* 131. 10.1172/JCI144486.
- 635 33. Xu, L., Wang, J., Liu, Y., Xie, L., Su, B., Mou, D., Wang, L., Liu, T., Wang, X.,  
636 Zhang, B., Zhao, L., et al. (2019). CRISPR-Edited Stem Cells in a Patient with HIV  
637 and Acute Lymphocytic Leukemia. *N Engl J Med* 381, 1240-1247.  
638 10.1056/NEJMoa1817426.
- 639 34. Heckl, D., Kowalczyk, M.S., Yudovich, D., Belizaire, R., Puram, R.V., McConkey,  
640 M.E., Thielke, A., Aster, J.C., Regev, A., and Ebert, B.L. (2014). Generation of  
641 mouse models of myeloid malignancy with combinatorial genetic lesions using  
642 CRISPR-Cas9 genome editing. *Nat Biotechnol* 32, 941-946.

- 643 35. Hsu, P.D., Scott, D.A., Weinstein, J.A., Ran, F.A., Konermann, S., Agarwala, V.,  
644 Li, Y., Fine, E.J., Wu, X., Shalem, O., Cradick, T.J., et al. (2013). DNA targeting  
645 specificity of RNA-guided Cas9 nucleases. *Nat Biotechnol* 31, 827-832.  
646 10.1038/nbt.2647.
- 647 36. Trkola, A., Matthews, J., Gordon, C., Ketas, T., and Moore, J.P. (1999). A cell line-  
648 based neutralization assay for primary human immunodeficiency virus type 1  
649 isolates that use either the CCR5 or the CXCR4 coreceptor. *J Virol* 73, 8966-8974.
- 650 37. Vakulskas, C.A., Dever, D.P., Rettig, G.R., Turk, R., Jacobi, A.M., Collingwood,  
651 M.A., Bode, N.M., McNeill, M.S., Yan, S., Camarena, J., Lee, C.M., et al. (2018).  
652 A high-fidelity Cas9 mutant delivered as a ribonucleoprotein complex enables  
653 efficient gene editing in human hematopoietic stem and progenitor cells. *Nature*  
654 *Medicine* 24, 1216-1224. 10.1038/s41591-018-0137-0.
- 655 38. Tycko, J., Myer, V.E., and Hsu, P.D. (2016). Methods for Optimizing CRISPR-Cas9  
656 Genome Editing Specificity. *Molecular Cell*.
- 657 39. Beane, J.D., Lee, G., Zheng, Z., Mendel, M., Abate-Daga, D., Bharathan, M., Black,  
658 M., Gandhi, N., Yu, Z., Chandran, S., Giedlin, M., et al. (2015). Clinical Scale Zinc  
659 Finger Nuclease-mediated Gene Editing of PD-1 in Tumor Infiltrating Lymphocytes  
660 for the Treatment of Metastatic Melanoma. *Molecular therapy : the journal of the*  
661 *American Society of Gene Therapy* 23, 1380-1390. 10.1038/mt.2015.71.
- 662 40. Sharma, M., Afrin, F., Satija, N., Tripathi, R.P., and Gangenahalli, G.U. (2011).  
663 Stromal-derived factor-1/CXCR4 signaling: indispensable role in homing and  
664 engraftment of hematopoietic stem cells in bone marrow. *Stem Cells Dev* 20, 933-  
665 946. 10.1089/scd.2010.0263.

- 666 41. Liles, W.C., Broxmeyer, H.E., Rodger, E., Wood, B., Hubel, K., Cooper, S., Hangoc,  
667 G., Bridger, G.J., Henson, G.W., Calandra, G., and Dale, D.C. (2003). Mobilization  
668 of hematopoietic progenitor cells in healthy volunteers by AMD3100, a CXCR4  
669 antagonist. *Blood* 102, 2728-2730. 10.1182/blood-2003-02-0663.
- 670 42. Allen, A.G., Chung, C.H., Atkins, A., Dampier, W., Khalili, K., Nonnemacher, M.R.,  
671 and Wigdahl, B. (2018). Gene Editing of HIV-1 Co-receptors to Prevent and/or  
672 Cure Virus Infection. *Frontiers in microbiology* 9, 2940. 10.3389/fmicb.2018.02940.
- 673 43. Zou, Y.R., Kottmann, A.H., Kuroda, M., Taniuchi, I., and Littman, D.R. (1998).  
674 Function of the chemokine receptor CXCR4 in haematopoiesis and in cerebellar  
675 development. *Nature* 393, 595-599. 10.1038/31269.
- 676 44. Pinello, L., Canver, M.C., Hoban, M.D., Orkin, S.H., Kohn, D.B., Bauer, D.E., and  
677 Yuan, G.C. (2016). Analyzing CRISPR genome-editing experiments with  
678 CRISPResso. *Nat Biotechnol* 34, 695-697. 10.1038/nbt.3583.
- 679 45. Gartner, S., Markovits, P., Markovitz, D.M., Kaplan, M.H., Gallo, R.C., and Popovic,  
680 M. (1986). The role of mononuclear phagocytes in HTLV-III/LAV infection. *Science*  
681 233, 215-219.
- 682 46. Collman, R., Balliet, J.W., Gregory, S.A., Friedman, H., Kolson, D.L., Nathanson,  
683 N., and Srinivasan, A. (1992). An infectious molecular clone of an unusual  
684 macrophage-tropic and highly cytopathic strain of human immunodeficiency virus  
685 type 1. *J Virol* 66, 7517-7521.
- 686 47. Adachi, A., Gendelman, H.E., Koenig, S., Folks, T., Willey, R., Rabson, A., and  
687 Martin, M.A. (1986). Production of acquired immunodeficiency syndrome-

688 associated retrovirus in human and nonhuman cells transfected with an infectious  
689 molecular clone. *J Virol* 59, 284-291.

690
